# Supplementary material for: Kepuasan Mahasiswa Mahasiswi Terhadap Kualiti Kehidupan Di Kolej Tun Dr.Ismail Universiti Teknologi Malaysia, Skudai, Johor
Source: Oxford University Press journal article supplement (doi:10.1158/0008-5472.can-21-1438), 2010-10-05
Supplement: 00085472can211438-sup-265307_2_supp_7403950_qzwly8.pdf [file 00085472can211438-sup-265307_2_supp_7403950_qzwly8.pdf]

## Supplementary Information

### Raman spectroscopy and machine learning reveals early tumor microenvironmental changes induced by immunotherapy

Santosh Kumar Paidi<sup>1,#,&</sup>, Joel Rodriguez Troncoso<sup>2,#</sup>, Piyush Raj<sup>1</sup>, Paola Monterroso Diaz<sup>2</sup>, Jesse D. Ivers<sup>2</sup>, David E. Lee<sup>3§</sup>, Nathan L. Avaritt<sup>4,5,7</sup>, Allen J. Gies<sup>4,5</sup>, Charles M. Quick<sup>6</sup>, Stephanie D. Byrum<sup>4,5,7</sup>, Alan J. Tackett<sup>4,5,7</sup>, Narasimhan Rajaram<sup>2,5,\*</sup>, Ishan Barman<sup>1,8,9,\*</sup>

<sup>1</sup>Department of Mechanical Engineering, Johns Hopkins University, Baltimore, MD, 21218

<sup>2</sup>Department of Biomedical Engineering, University of Arkansas, Fayetteville, AR, 72701

<sup>3</sup>Department of Health, Human Performance, and Recreation, University of Arkansas, Fayetteville, AR, 72701

<sup>4</sup>Department of Biochemistry and Molecular Biology, University of Arkansas for Medical Sciences, Little Rock, AR, 72205

<sup>5</sup>Winthrop P. Rockefeller Cancer Institute, University of Arkansas for Medical Sciences, Little Rock, AR, 72205

<sup>6</sup>Division of Pathology, University of Arkansas for Medical Sciences, Little Rock, AR, 72205

<sup>7</sup>Arkansas Children's Research Institute, Little Rock, AR, 72205

<sup>8</sup>The Russell H. Morgan Department of Radiology and Radiological Science, The Johns Hopkins University School of Medicine, Baltimore, MD, 21205

<sup>9</sup>Department of Oncology, Johns Hopkins University, Baltimore, MD, 21287

#Both authors contributed equally to this work.

& Current affiliation – School of Optometry, University of California, Berkeley, CA, 94720

§ Current affiliation – Duke Molecular Physiological Institute, Duke University, 300 N. Duke St., Durham, NC, 27701

**Running title:** Raman spectroscopy of response to immunotherapy

**\*Corresponding authors:**

Narasimhan Rajaram, University of Arkansas, Department of Biomedical Engineering, 700 W. Research Center Blvd., Fayetteville, AR 72701, USA, Email: nrajaram@uark.edu, Phone: 479-575-7282

Ishan Barman, Johns Hopkins University, Department of Mechanical Engineering, 3400 N Charles St, Latrobe 103, Baltimore, MD 21218, USA, Email: ibarman@jhu.edu, Phone: 410-516-0656

The authors disclose no potential conflicts of interest.

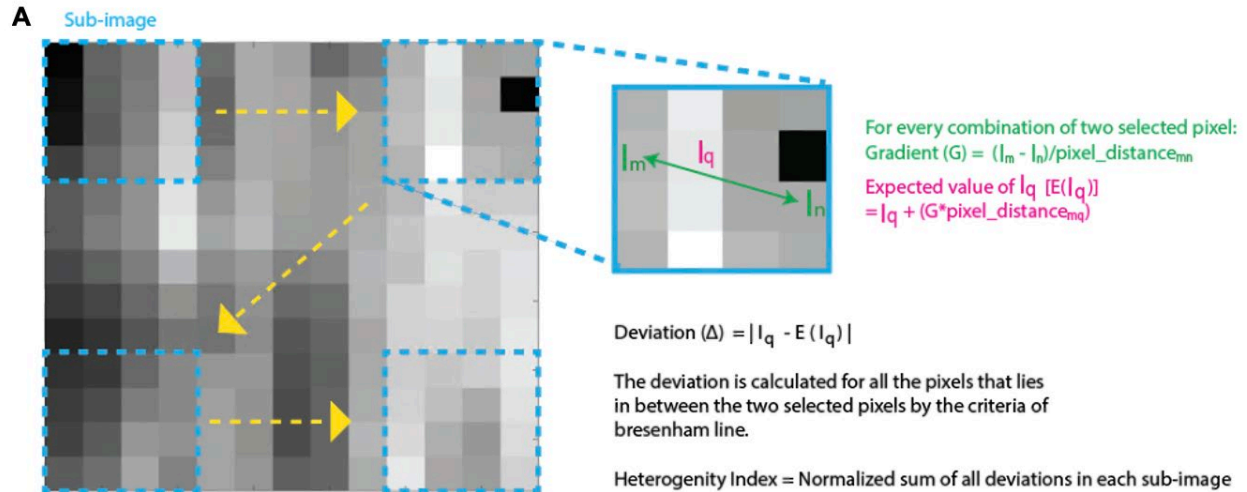

We find heterogeneity index for each 4 pixel x 4 pixel sub-image obtained by raster scanning a 4x4 moving window across the MCR scoremaps.

This analysis is repeated for all the MCR Scores and for all the tumors.

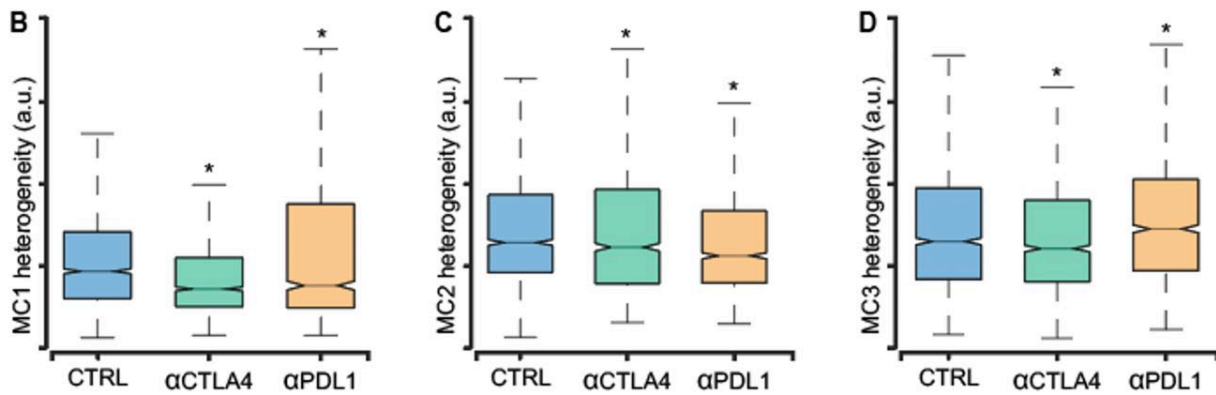

**Figure S1. Raman assessment of changes in spatial heterogeneity in response to immunotherapy.** (A) A schematic of the method used for the measurement of heterogeneity index is shown. Box and whisker plots showing the median and interquartile range for the spatial heterogeneity indices derived from the MCR score maps of the tumors in the treatment groups are presented for (B) MC1, (C) MC2 and (D) MC3. The statistical significance of the differences in the heterogeneity of the immune checkpoint inhibitor-treated tumors compared to the controls are assessed by Wilcoxon rank sum test. \* indicates p-value < 0.05.

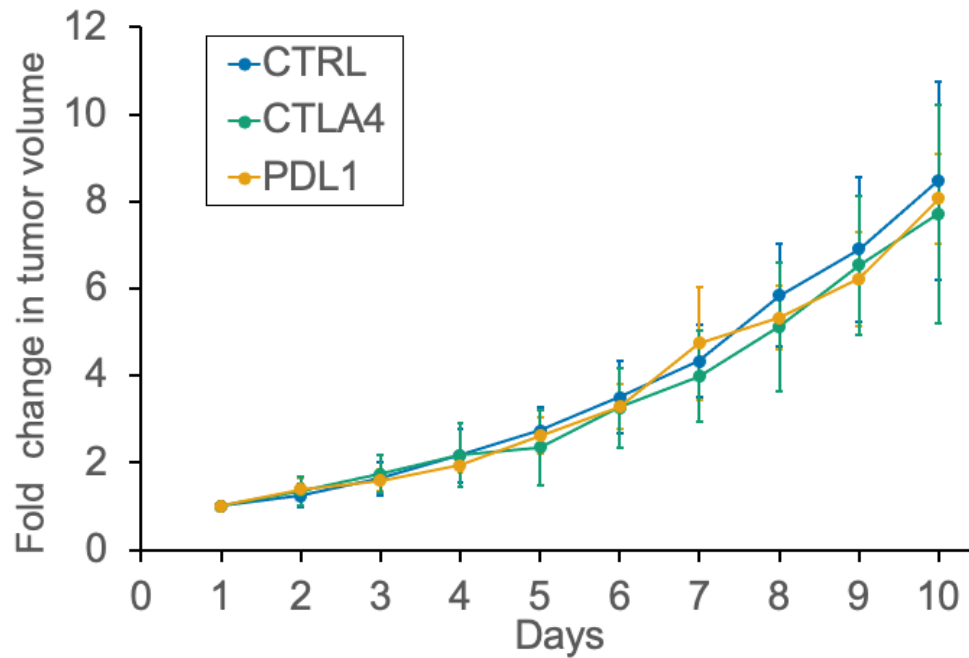

**Figure S2. Evolution of tumor volume with immunotherapy.** The curves show the mean (marker) and standard deviation (error bars) of the volume (fold change compared to day 1) for tumors in the CTRL,  $\alpha$ CTLA4, and  $\alpha$ PDL1 treatment groups show mean and standard deviation of the volumes (fold change compared to day 1).

**Table ST1.** Table of MCR-ALS component spectral peak assignments

| Observed Raman peaks in the MCR loadings (cm <sup>-1</sup> ) |      |      |      |      | Raman band assignment from literature                                       |
|--------------------------------------------------------------|------|------|------|------|-----------------------------------------------------------------------------|
| MC1                                                          | MC2  | MC3  | MC4  | MC5  |                                                                             |
|                                                              | 793  |      |      |      | O-P-O stretching in DNA                                                     |
|                                                              | 813  |      |      |      | O-P-O stretching in DNA and RNA                                             |
|                                                              |      | 851  | 849  |      | C-C stretch of proline in collagen                                          |
|                                                              |      |      |      | 908  | Formalin contamination during tissue fixation                               |
|                                                              |      | 930  | 930  |      | C-C vibration in collagen backbone                                          |
|                                                              |      | 1042 |      |      | Proline in collagen                                                         |
|                                                              |      |      |      | 1042 | Formalin contamination during tissue fixation                               |
| 1078                                                         |      |      |      |      | C-C stretch                                                                 |
|                                                              | 1073 |      |      |      | PO <sub>2</sub> <sup>-</sup> symmetric stretching in DNA                    |
|                                                              | 1235 |      |      |      | PO <sub>2</sub> <sup>-</sup> asymmetric stretching in DNA                   |
|                                                              |      |      |      | 1247 | Formalin contamination during tissue fixation                               |
|                                                              |      | 1256 |      |      | Amide III in collagen                                                       |
|                                                              |      |      | 1262 |      | Amide III in collagen                                                       |
| 1266                                                         |      |      |      |      | CH <sub>2</sub> in-plane deformation (Triglyceride)                         |
| 1302                                                         |      |      | 1301 |      | CH vibration (Triglyceride)                                                 |
|                                                              |      | 1315 |      |      | CH <sub>3</sub> CH <sub>2</sub> twisting modes of collagen                  |
|                                                              |      |      |      |      | CH <sub>3</sub> CH <sub>2</sub> wagging modes of collagen and nucleic acids |
| 1442                                                         |      |      | 1442 |      | CH <sub>2</sub> bending mode (Triglyceride)                                 |
|                                                              |      | 1448 |      |      | CH <sub>2</sub> bending mode in collagen                                    |
|                                                              |      |      |      | 1489 | Formalin contamination during tissue fixation                               |
| 1654                                                         |      |      |      |      | C=C lipid stretch                                                           |
|                                                              |      | 1657 | 1657 |      | α-helical structure of amide I in collagen                                  |

**Table ST2.** Assignment for the top spectral predictors derived from random forest analysis

| <b>Observed Raman peaks</b> | <b>Raman band assignment from literature</b>    |
|-----------------------------|-------------------------------------------------|
| 981                         | C-C stretching (proteins)                       |
| 1065                        | =CH bending (lipids)                            |
| 1323                        | C-C stretch (lipids)                            |
| 1386                        | $\delta$ CH <sub>3</sub> symmetric band (lipid) |
| 1574                        | Nucleic acid modes                              |
| 1596                        | C=C in-plane bending mode (phenylalanine)       |
| 1652                        | Amide I (collagen) / C=C stretch (lipids)       |
| 1763                        | C=O stretch (lipids)                            |
